# Supplementary material for: Association between joint hypermobility, scoliosis, and cranial base anomalies in paediatric Osteogenesis imperfecta patients: a retrospective cross-sectional study
Source: PubMed Central journal article supplement (PMC4300610; doi:10.1186/1471-2474-15-428), 2014-12-13

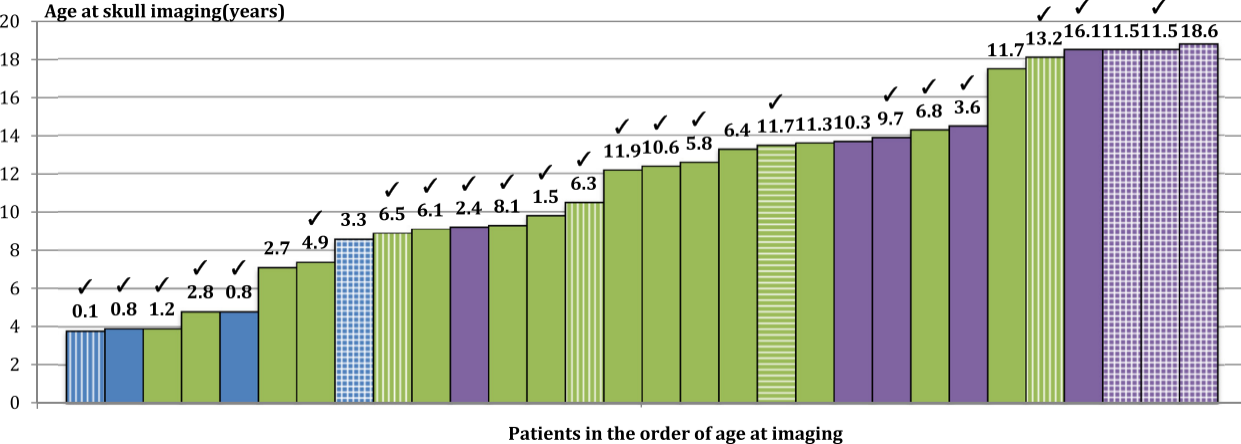

Supplement: 12891_2014_2387_MOESM1_ESM.pdf [file 12891_2014_2387_MOESM1_ESM.pdf]
